# Supplementary figures and images for: Endometrial SUSD2+ Mesenchymal Stem/Stromal Cells in Tissue Engineering: Advances in Novel Cellular Constructs for Pelvic Organ Prolapse
Source: MDPI journal article supplement (doi:10.3390/jpm11090840), 2021-08-26

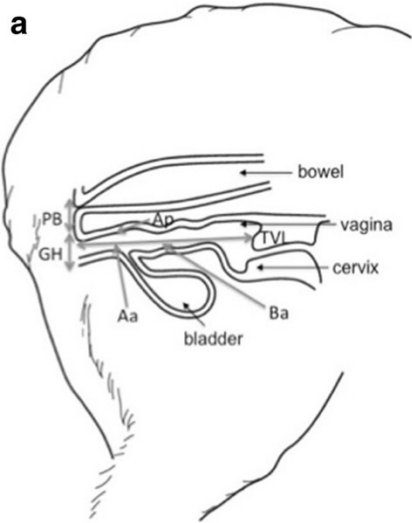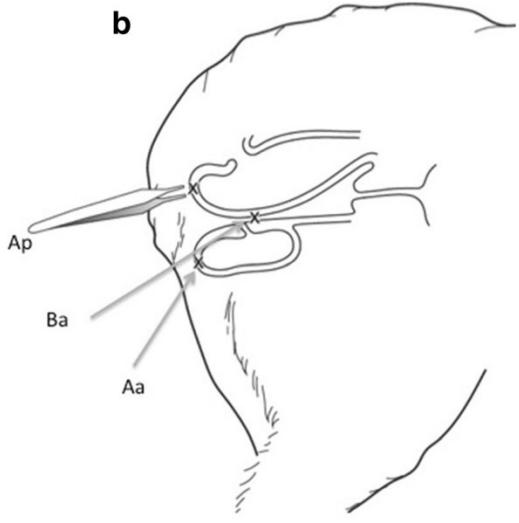

Supplement: s1 [file s1]
